# Supplementary material
Source: Springer Nature journal article supplement (https://www.springermedizin.de/resource/supplementary/12876_2012_729_MOESM1_ESM.pdf/9437780)

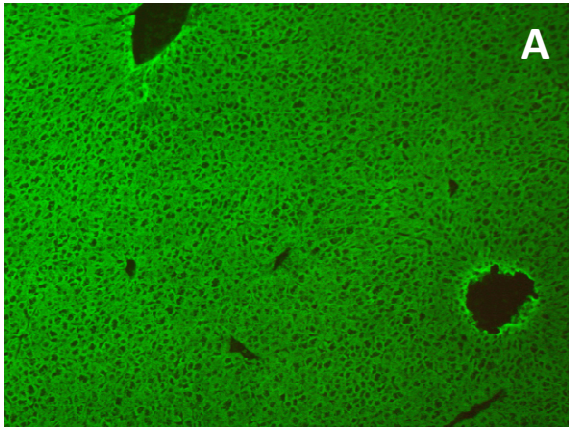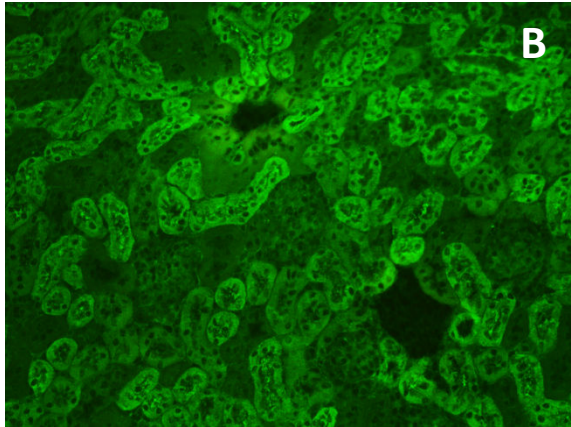

Supplement: MOESM1 [file 9437780]
